# Supplementary material for: A serendipitous phosphonocarboxylate complex of boron: when vessel becomes reagent
Source: Royal Society of Chemistry journal article supplement (doi:10.1039/c1cc10876j), 2011-01-01
Supplement: c1cc10876j.pdf [file c1cc10876j.pdf]

## SUPPLEMENTARY DATA

# A serendipitous phosphonocarboxylate complex of boron: when vessel becomes reagent

Katarzyna M. Błażewska,<sup>a,b</sup> Ralf Haiges,<sup>a</sup> Boris A. Kashemirov,<sup>a</sup> Frank H. Ebetino,<sup>c</sup> Charles E. McKenna<sup>\*a</sup>

<sup>a</sup> Department of Chemistry, University of Southern California, Los Angeles, CA 90089-0744, USA; Fax: +1 310 740 0930; Tel: +1 310 740 2698; E-mail: [mckenna@usc.edu](mailto:mckenna@usc.edu)

<sup>b</sup> Institute of Organic Chemistry, Technical University of Łódź, Zeromskiego St. 116, 90-924 Łódź, Poland; Fax: +48 42 636 55 30; Tel: +48 42 631 31 46

<sup>c</sup> Warner Chilcott Pharmaceuticals, Mason, OH 45040, USA; Tel: +1 513 622 3630

| Table of Contents                                                                                                                                                                                                                | S: |
|----------------------------------------------------------------------------------------------------------------------------------------------------------------------------------------------------------------------------------|----|
| General methods, reagents and materials.....                                                                                                                                                                                     | 3  |
| HPLC and NMR detection of 5 and 6 .....                                                                                                                                                                                          | 3  |
| pH and temperature effects (3) .....                                                                                                                                                                                             | 3  |
| Vessel effects (3) .....                                                                                                                                                                                                         | 4  |
| pH and temperature effects (1) .....                                                                                                                                                                                             | 4  |
| Vessel effects (1) .....                                                                                                                                                                                                         | 4  |
| HRMS studies .....                                                                                                                                                                                                               | 4  |
| Detection of 11B NMR signal .....                                                                                                                                                                                                | 4  |
| Crystallization of 5 compound isolated from evaporate of 3 and X-ray crystallographic analysis.....                                                                                                                              | 4  |
| Identification of the source of boron .....                                                                                                                                                                                      | 5  |
| 3 boron complex generation from borate.....                                                                                                                                                                                      | 5  |
| Figure S1. HPLC trace of the “ghost” compound from 3-E1 after isolation by preparative HPLC.....                                                                                                                                 | 5  |
| Figure S2. Same solution as in Figure S3, after being stored at rt, pH 7.4, for 27 h, 44 h, 72 h. ....                                                                                                                           | 5  |
| Figure S3. HPLC trace of 3 enantiomers (E1, E2) from 3 racemate sample. ....                                                                                                                                                     | 6  |
| Figure S4. <sup>1</sup> H NMR (D <sub>2</sub> O, pH 3.6, 400 MHz) of the “ghost” compound from 3-E1 after preparative HPLC isolation as above.....                                                                               | 6  |
| Figure S5. <sup>1</sup> H NMR of product from reaction of 3 with aq. sodium borate (rt). Compare with Figure S4. ....                                                                                                            | 7  |
| Figure S6. <sup>31</sup> P NMR of product from reaction of 3 with aq. sodium borate (rt). Compare with Figure 3 in the manuscript.....                                                                                           | 7  |
| Figure S7. FAB HRMS of the isolated “ghost” compound derived from 3-E2. ....                                                                                                                                                     | 8  |
| Figure S8. ORTEP drawings of both (S,S)-3 and (R,R)-3 dimer boron complexes formed in the crystal.....                                                                                                                           | 9  |
| Figure S9. Structures of diastereomeric dimer boron complexes. ....                                                                                                                                                              | 9  |
| Figure S10. Unit cell of the (R,R)-3 and (S,S)-3 dimer boron complex.....                                                                                                                                                        | 10 |
| Table S1. Crystal data and structure refinement for C <sub>20</sub> H <sub>14</sub> BN <sub>4</sub> O <sub>16</sub> P <sub>2</sub> . ....                                                                                        | 11 |
| Table S2. Atomic coordinates (× 10 <sup>4</sup> ) and equivalent isotropic displacement parameters (Å <sup>2</sup> × 10 <sup>3</sup> ) for C <sub>20</sub> H <sub>14</sub> BN <sub>4</sub> O <sub>16</sub> P <sub>2</sub> . .... | 12 |
| Table S3. Bond lengths [Å] and angles [°] for C <sub>20</sub> H <sub>14</sub> BN <sub>4</sub> O <sub>16</sub> P <sub>2</sub> . ....                                                                                              | 13 |
| Table S4. Anisotropic displacement parameters (Å <sup>2</sup> × 10 <sup>3</sup> ) for C <sub>20</sub> H <sub>14</sub> BN <sub>4</sub> O <sub>16</sub> P <sub>2</sub> . ....                                                      | 14 |

|                                                                                                                                                                                                                |    |
|----------------------------------------------------------------------------------------------------------------------------------------------------------------------------------------------------------------|----|
| Table S5. Hydrogen coordinates ( $\times 10^4$ ) and isotropic displacement parameters ( $\text{\AA}^2 \times 10^3$ ) for C <sub>20</sub> H <sub>14</sub> BN <sub>4</sub> O <sub>16</sub> P <sub>2</sub> ..... | 15 |
| Parameters and numerical results for Spartan calculations of dimer complexes of boron.....                                                                                                                     | 16 |
| Reference List.....                                                                                                                                                                                            | 19 |

### General methods, reagents and materials

Compound **1** was a gift from Procter & Gamble Pharmaceuticals, Inc. Compound **3** was synthesized by our published method.<sup>1</sup> All solvents and reagents were reagent grade, purchased commercially from Sigma-Aldrich, Inc. and used without further purification except as mentioned below. Triethylamine was freshly distilled before use. HPLC was carried out using a Dynamax Rainin Model SD – 200 pump equipped with a Shimadzu SPD – 10A VP UV Vis detector on ProntoSIL AX QN 8 × 150 mm and ProntoSIL AX QD 4 × 150 mm chiral columns (Bischoff Chromatography, Leonberg, Germany). The columns were eluted isocratically with 0.7 M TEAA in 75% MeOH at pH 5.8 for enantioseparation of **3**, or with 0.25 M TEAA in 75% MeOH at pH 6.9 for enantioseparation of **1**. NMR spectra were measured on Varian Mercury 400 and Bruker 250 spectrometers. Chemical shifts ( $\delta$ ) are reported in parts per million (ppm) relative to internal residual HDO in D<sub>2</sub>O (pH ~12,  $\delta$  4.7) (<sup>1</sup>H) or ext. H<sub>3</sub>PO<sub>4</sub> (<sup>31</sup>P). Standard MS was performed using a Thermo-Finnigan LCQ DECA XP<sub>max</sub> Ion Trap LC/MS/MS equipped with an ESI probe. HRMS analysis was performed at the UC Riverside MS Facility, using a VG-ZAB MS spectrometer operated in FAB mode. Mass spectra simulations were calculated using the iMass program for Apple Mac computers. UV spectra were acquired on a Beckmann Coulter DU 800 spectrophotometer. Concentrations of **3** and **5** in aqueous solution (pH 6.3) were assigned from their UV spectra, using  $\epsilon = 6450$  at 280 nm, as determined for **3**.<sup>1</sup>

Geometric direct minimization calculations were performed using the SPARTAN '08 Quantum Mechanics software suite: Release 132v4, using the RHF-SCF method and the 3-21G\* basis set.

### HPLC and NMR detection of **5** and **6**

In chiral HPLC separations of the **3** enantiomers, fractions were collected into “fresh” borosilicate glass test tubes (VWR, Inc.). Reanalysis of the isolated enantiomer fraction (~1-2 mg) after concentration by evaporation often revealed the presence of a small, early-eluting extra peak (Figure 2 in the manuscript). Due to its ephemeral nature (it decreased on standing or disappeared on heating in aq. solution at pH  $\geq$  7), it was initially referred to informally as a “ghost” compound. The unprocessed **3** racemate did not give a detectable “ghost” peak on HPLC analysis (*cf.* Figure 2 in the manuscript). A similar phenomenon was observed with **1** enantiomer separations (data not shown), and it was found that enrichment in the “ghost” products **6** could be achieved by keeping sample size small (Figure 2/inset in the manuscript).

The “ghost” species from **3** (E1 enantiomer) could be isolated by preparative HPLC, giving a compound which when dissolved in 0.7 M TEAA in 75% MeOH at pH 5.8, 22 °C gave a single HPLC peak, ret. time 9.15 min at 1 mL/min elution from the AX QD column (Figure S1). After standing for 72 h at ~22 °C, at pH 7.4, re-analysis on the AX QD column showed disappearance of this peak, with one new peak created with ret. time 12.8 min, identified as **3**-E1 (Figure S2). An HPLC analysis of racemic **3** is presented in Figure S3.

The “ghost” compound **5** derived from **3**-E1 (or from **3**-E2) has distinct <sup>1</sup>H (Figure S4) and <sup>31</sup>P (Figure 3 in the manuscript) NMR spectra, the latter showing a single peak at  $\delta$  11.9 in D<sub>2</sub>O at pH 3.6, upfield from **3** itself ( $\delta \geq$  13). <sup>31</sup>P NMR values for **3** were  $\delta$  12.9-13.0 (pH 2.8) to  $\delta$  15.6 (pH 7); for the **3** “ghost” (major)  $\delta$  11.8 – 11.9 (pH 2.8-7). This permitted convenient exploration of conditions that might affect the formation and stability of the “ghost” compounds derived from **3**.

The following experiments were carried out on 0.5 – 1 mg samples of **3** on preparative HPLC isolates of the **3** enantiomers after collection into “fresh” borosilicate glass test tubes, evaporation and storage in “fresh” borosilicate glass vials, unless otherwise noted.

The <sup>31</sup>P NMR singlet of **6** at  $\delta$  12.2 ppm (pH 4.8), was accompanied by two other small singlets at  $\delta$  ppm, both with approximately the same integration. These were not investigated, but might correspond to an asymmetric dimer.

### pH and temperature effects (**3**)

- 3**-E1, 18 mM (UV) in H<sub>2</sub>O, pH 6.2, heated to 90 °C, cooled to rt, sealed in a fresh glass ampule and kept at 5 – 7 °C for 1 yr: **3**, 90%; “ghost”, 10% (HPLC).
- As in a. but, after 4 mos: **3**, 96%, “ghost”, 4%.
- As in a. but, pH 7.5, after 3 mos: **3**, 100%.
- As in a. but, pH 7.0, after 13.5 mos: **3**, 100%.
- As in a. but, pH 4.8, after 4 d: **3**, 70%, “ghost”, 30%.
- As in a. but, 3 – 6 mM evaporated at pH 2.8 (H<sup>+</sup> Dowex); then pH adjusted to 7: initially, **3** 60%, “ghost”, 40%; immediately after pH 7, **3** 59%, “ghost” 36%; new peak at  $\delta$  11.5 (5%).
- As in a. but, adjust pH to 6.5, 85 °C, 2 h or 4 d, rt; or 1 d, 5 °C: **3**, 100%.

It was concluded that acidic pH during evaporation favored “ghost” product formation, whereas near neutral

pH, it was converted back to **3**; this process was accelerated by heating in water. Similar results were obtained with solutions containing 5 mM MgCl<sub>2</sub> (data not shown).

### Vessel effects (3)

- Vials rinsed with EtOH and then with H<sub>2</sub>O and dried gave somewhat reduced yields of the **5** product at pH 2.8.
- When polypropylene vials were substituted for the glass vials, no **5** product formation could be detected under any of the above conditions.

### pH and temperature effects (1)

- 1**, 30 mM, pH 4: **1**, 87% ( $\delta$  15.0), “ghost” product, 9% ( $\delta$  12.1); 47%-49% after 20 h, 5 °C or 42%-55% after 7 d rt.
- 1**, ~33 mM, pH 2.5, 20 h: precipitate.
- 1**, 33 mM, pH 4.6, rt or after 20 h (5 °C): 95% **1**, ~4-5% “ghost” product.
- At pH  $\geq$  7.4 and 5 °C, no “ghost” product was detected after up to 15 d storage.

### Vessel effects (1)

- 1**, 11-16 mM aq. solutions, pH 4.6 – 5.3 after evaporation in repeatedly washed (dil. HCl) borosilicate glassware and storage in polypropylene vials, or in a teflon bottle gave directly after evaporation, or after 2, 5, or 7 d storage, 100% **1** by <sup>31</sup>P NMR (no detectable “ghost” product).

It was concluded that the same pattern as with **3** was observed; however at low pH **1** gives a precipitate whose composition was not determined.

### HRMS studies

The purified **5** isolate from **3**-E2 was subjected to high resolution mass spectrometric analysis using a FAB instrument. The dominant peak was observed at 579.0488 M/Z, an excellent fit for <sup>12</sup>C<sub>20</sub><sup>1</sup>H<sub>18</sub><sup>16</sup>O<sub>12</sub><sup>14</sup>N<sub>4</sub><sup>31</sup>P<sub>2</sub><sup>11</sup>B: [M – H]<sup>–</sup> calcd, 579.049 but was a poor fit to a carbon-centered complex ([M – H]<sup>–</sup> calcd, 579.0318). The predicted [M – H – 1]<sup>–</sup> peak at ~20% of the [M – H]<sup>–</sup> peak intensity, due to a naturally abundant <sup>10</sup>B ion, is also observed (Figure S5).

### Detection of <sup>11</sup>B NMR signal

A comparable sample was found to have a broad resonance at ~7-8 ppm (160.42 MHz quartz sample tube; relative to ext. 15% BF<sub>3</sub> • OEt<sub>2</sub> in CDCl<sub>3</sub>).

### Crystallization of **5** compound isolated from evaporate of **3** and X-ray crystallographic analysis

Racemic **3** (2 mg) was placed in a fresh borosilicate vial (4 mL) and dissolved in 250  $\mu$ L H<sub>2</sub>O (heating applied to complete dissolution); 9  $\mu$ L TFA was added. The mixture was brought to rt and the solution evaporated in the air for 10 d to give a solid crystalline residue.

The single crystal X-ray diffraction data was collected on a Bruker 3-circle platform diffractometer equipped with a SMART CCD (APEX) detector with the  $\chi$ -axis fixed at 54.74° and using Mo K $\alpha$  radiation (Graphite monochromator) from a fine-focus tube. The diffractometer was equipped with a Cryo Industries Cryocool-LN2 apparatus for low-temperature data collection, using controlled liquid nitrogen boil-off. The crystals were mounted on a goniometer head using a CryoLoop and PFPE oil. Cell constants were determined from 60 ten-second frames. A complete hemisphere of data was scanned on omega (0.3°) with a run time of ten seconds per frame at a detector resolution of 512  $\times$  512 pixels using the SMART software package.<sup>2</sup> A total of 1,271 frames were collected in three sets and a final set of 50 frames, identical to the first 50 frames, was also collected to determine any crystal decay. The frames were then processed on a PC, running Windows 2000 software, by using the SAINT software package<sup>3</sup> to give the hkl files corrected for Lp/decay. The absorption correction was performed using the SADABS program.<sup>4</sup> The structure was solved by the direct method using the SHELX-90 program and refined by the least squares method on  $F^2$ , SHELXL-97 incorporated in SHELXTL Suite 6.12 for Windows NT/2000.<sup>5</sup> All non-hydrogen atoms were refined anisotropically. For the anisotropic displacement parameters, the  $U_{eq}$  is defined as one third of the trace of the orthogonalized  $U_{ij}$  tensor. ORTEP drawings were prepared using the ORTEP-3 for Windows V2.02 program.<sup>6</sup> Further details of the crystal structure investigations reported in this paper may be obtained from the Cambridge Crystallographic Data Centre (CCDC), 12 Union Road, Cambridge CB2 1EZ (UK) (fax: +44 (1223)336-033 or email: [deposit@ccdc.cam.ac.uk](mailto:deposit@ccdc.cam.ac.uk)) by quoting the depositary number CCDC 794952.

The crystal structure analysis revealed a mixture of (*R,R*) and (*S,S*) **3** dimer boron complexes (Figure S8-S9)

formed for the crystal.

### Identification of the source of boron

It was confirmed that the **5** compound was not formed from **3** under any of the following conditions: 1) exposure to the HPLC column without isolated sample evaporation; 2) prolonged exposure to TEAA buffer at pH 4-6 in repeatedly washed (dil. HCl) borosilicate glassware; 3) evaporation in repeatedly washed (dil. HCl) borosilicate glassware; 4) collection of HPLC fractions into polypropylene test tubes and evaporation in repeatedly washed (dil. HCl) borosilicate glassware. However, when HPLC fractions of **3** were collected into “fresh” VWR borosilicate glassware test tubes, a “ghost” peak was reproducibly detected.

### **3** boron complex generation from borate

**3** (2.2 mg, 0.0077 mmol) was suspended in 0.5 mL H<sub>2</sub>O and heated to dissolve (pH 2.7). To the resulting solution was added 0.7 M H<sub>3</sub>BO<sub>3</sub> aq. (0.5 equiv, no change in pH). After evaporation to dryness at 100 °C (oil bath 4 h) a white solid was obtained that was suspended in small amount of D<sub>2</sub>O, and dissolved by addition of 2.25 M aq. NaOH (final pH 5.7). The conversion of **3** into the product was 89% by <sup>31</sup>P NMR.

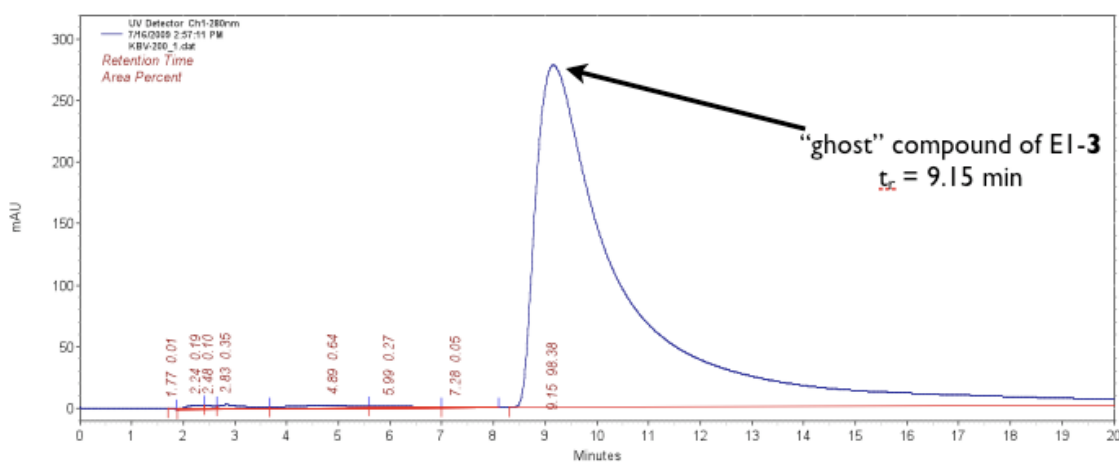

**Figure S1.** HPLC trace of the “ghost” compound from **3**-E1 after isolation by preparative HPLC. Conditions: AX QD 0.7 M TEA/AcOH in 75% MeOH, pH 5.8, flow rate 1 mL/min.

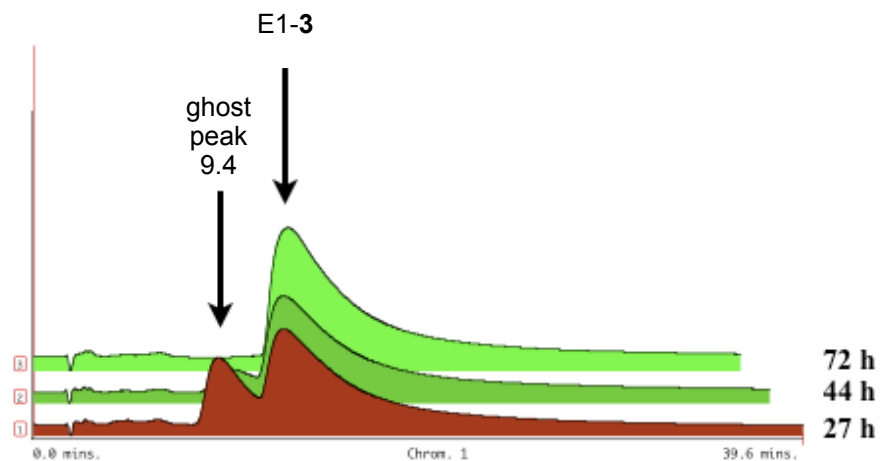

**Figure S2.** Same solution as in Figure S3, after being stored at rt, pH 7.4, for 27 h, 44 h, 72 h. Conditions: AX QD 0.7 M TEA/AcOH in 75% MeOH, pH 5.8, flow rate 1 mL/min.

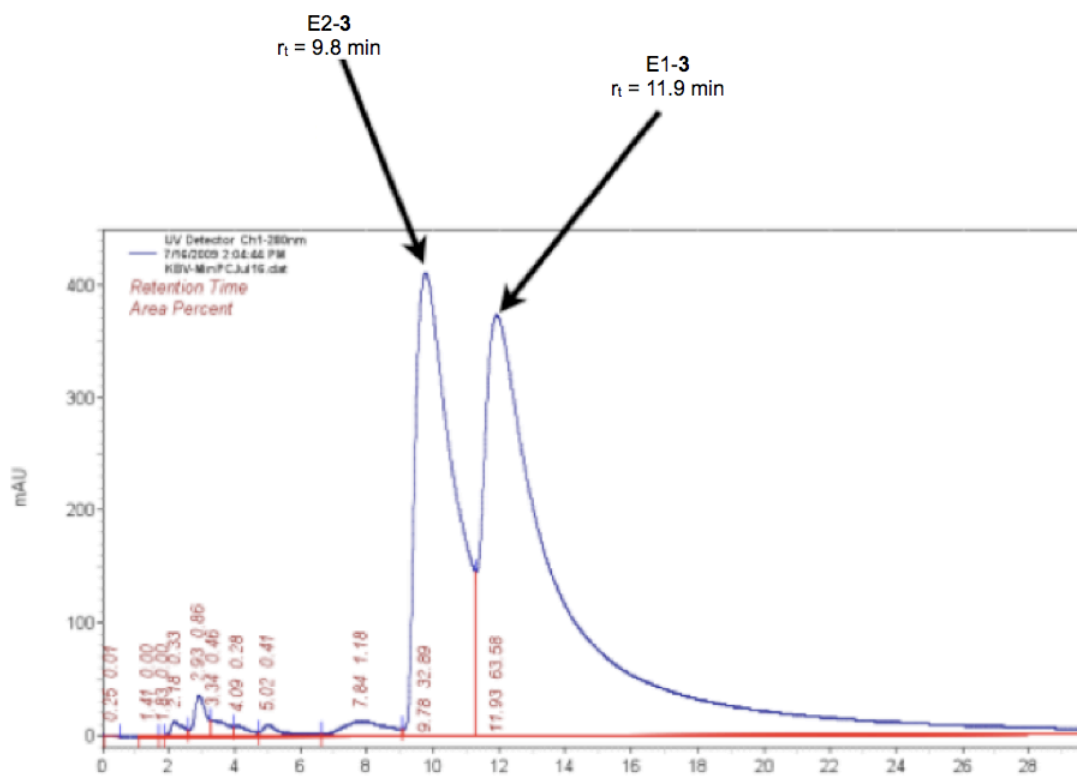

**Figure S3.** HPLC trace of **3** enantiomers (E1, E2) from **3** racemate sample.  
HPLC conditions: as above, AX QD column, flow rate = 1 mL/min.

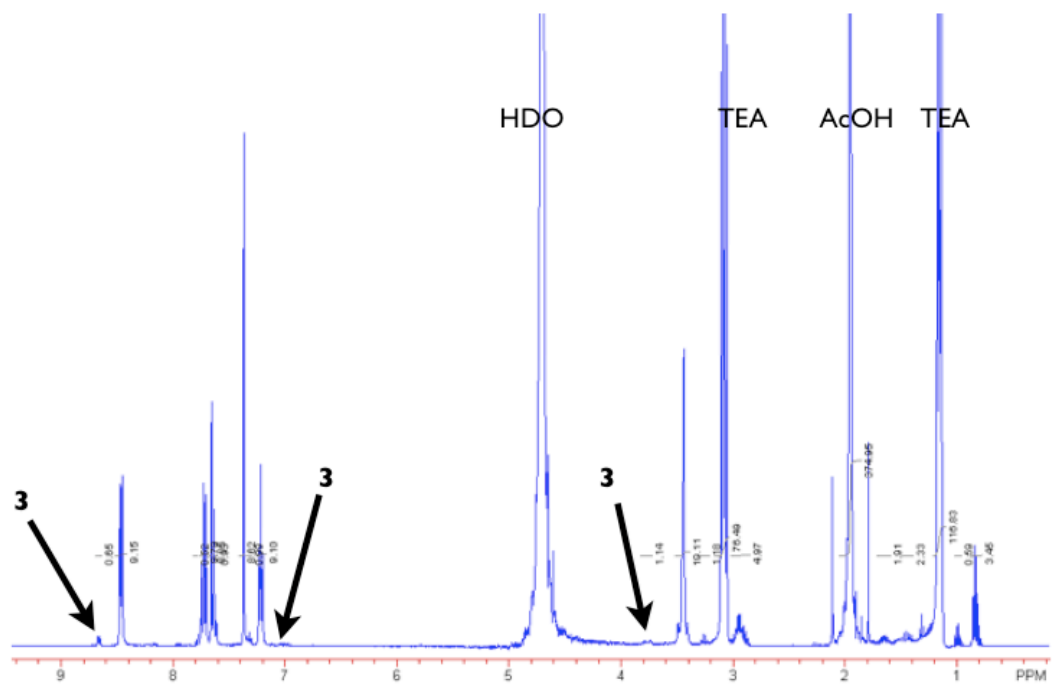

**Figure S4.** <sup>1</sup>H NMR (D<sub>2</sub>O, pH 3.6, 400 MHz) of the “ghost” compound from **3**-E1 after preparative HPLC isolation as above.

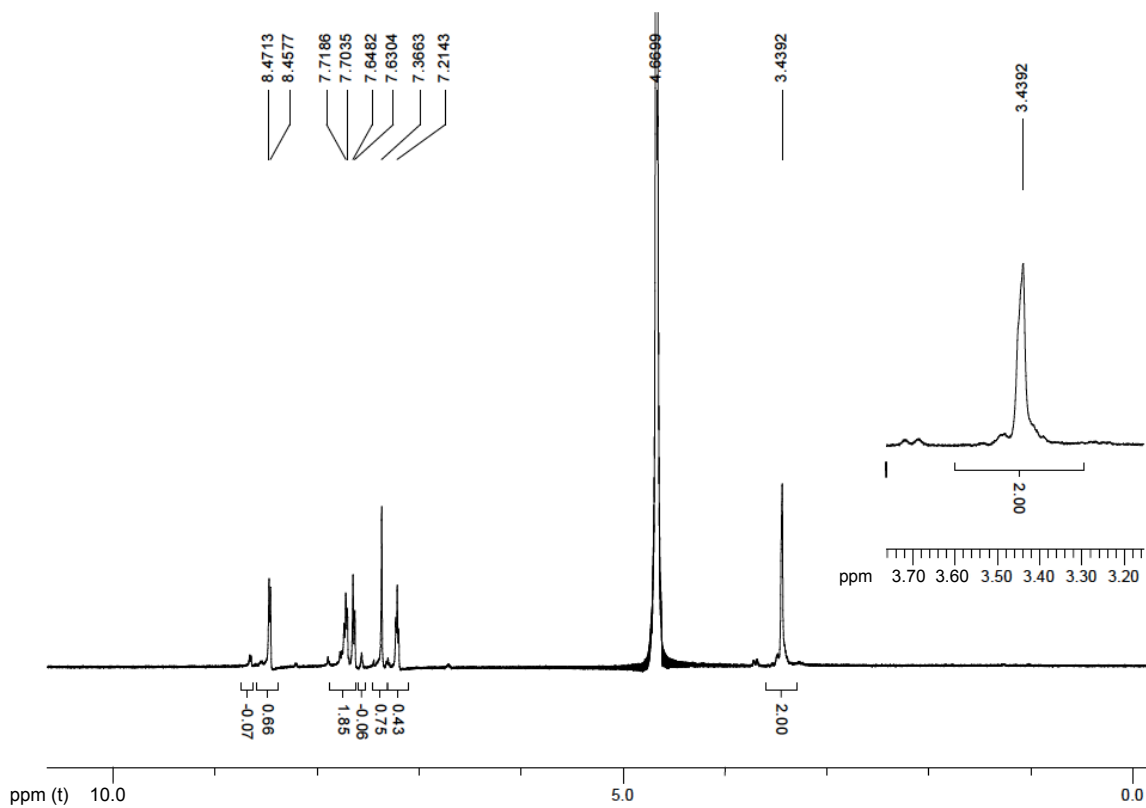

**Figure S5.**  $^1\text{H}$  NMR of product from reaction of **3** with aq. sodium borate (rt). Compare with Figure S4.

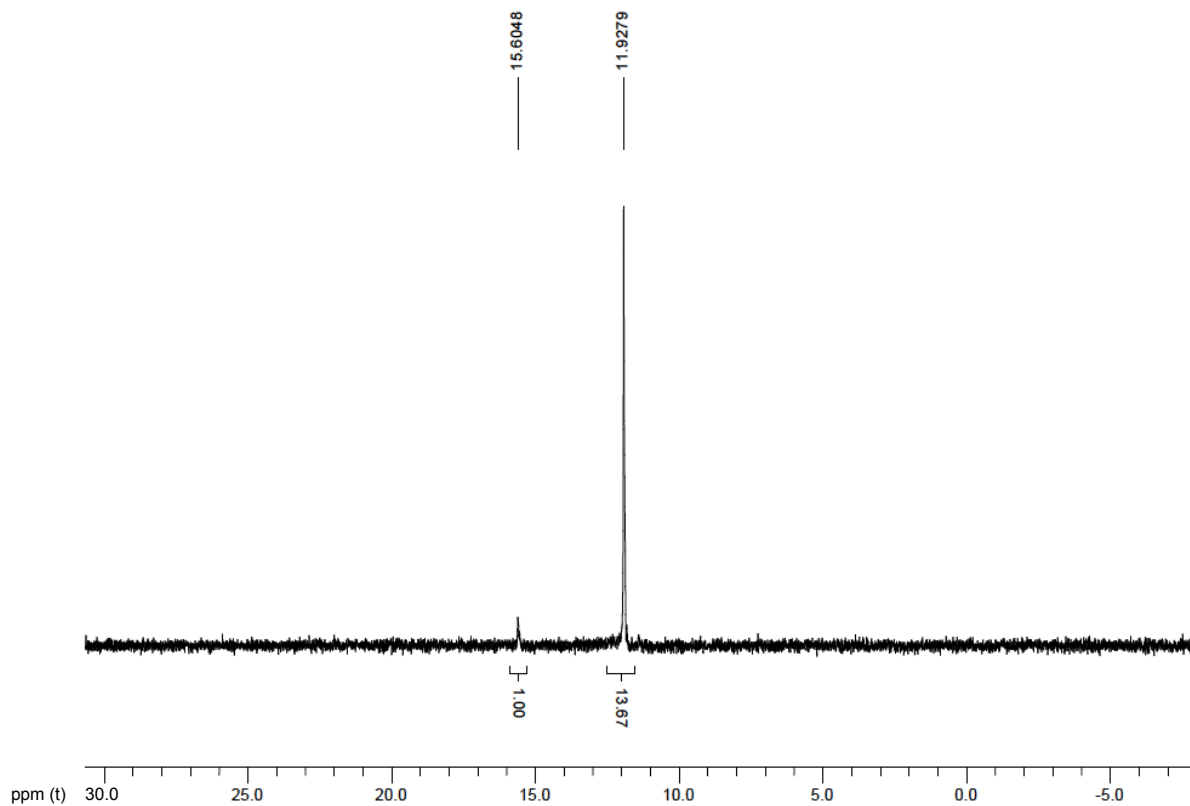

**Figure S6.**  $^{31}\text{P}$  NMR of product from reaction of **3** with aq. sodium borate (rt). Compare with Figure 3 in the manuscript.

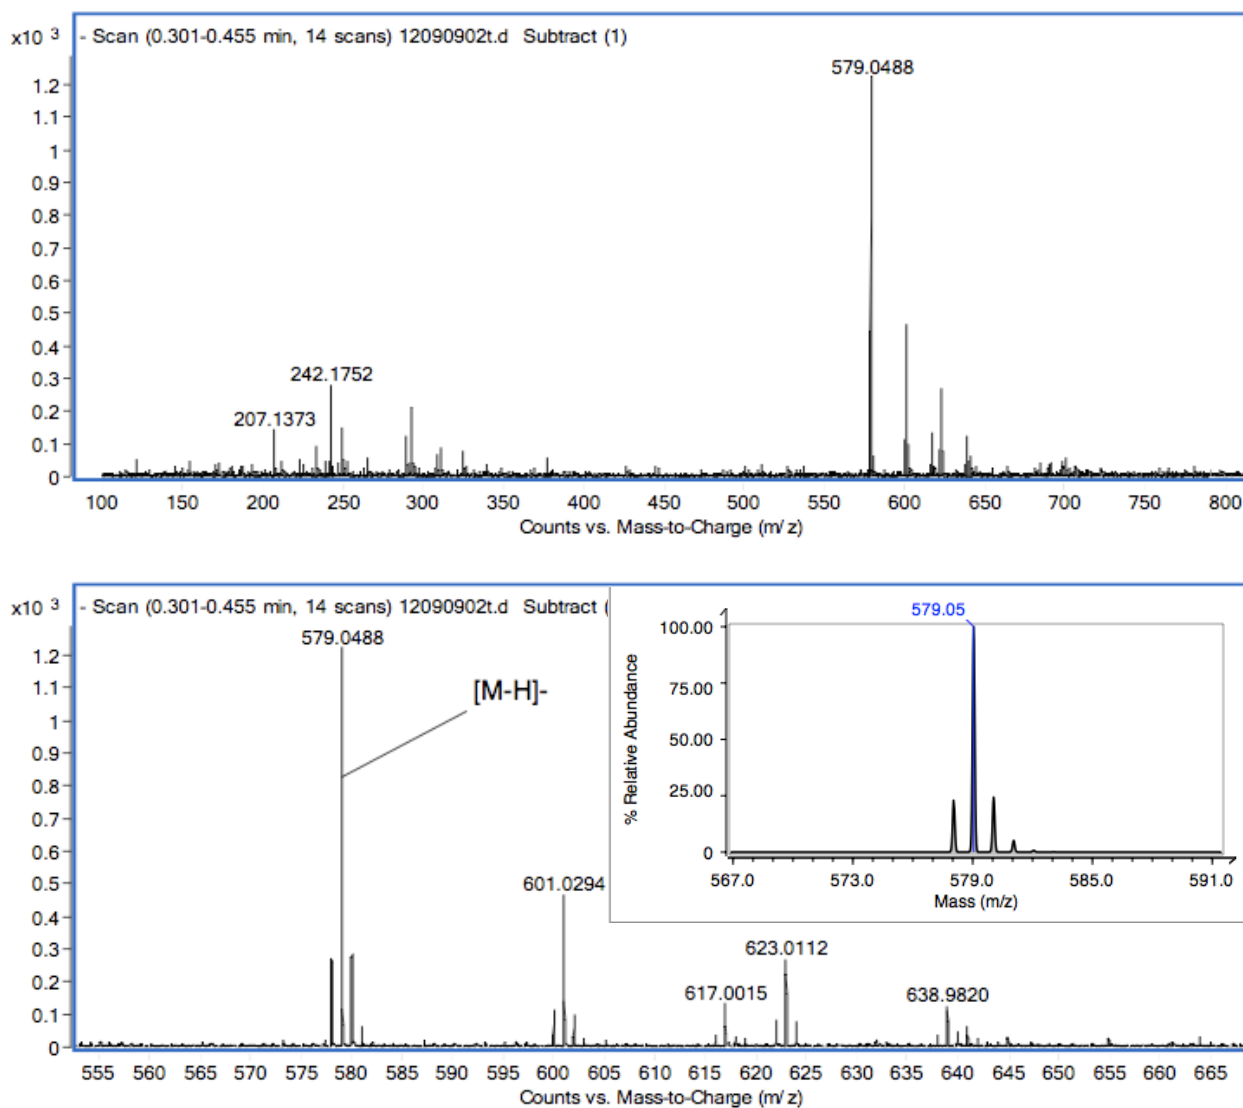

**Figure S7.** FAB HRMS of the isolated “ghost” compound derived from **3-E2**.  
(Lower spectrum is an enlargement of the upper spectrum; inset, predicted isotopic distribution pattern for  $C_{20}H_{18}O_{12}N_4P_2B$  near  $M/Z$  579 predicting a 20% relative abundance  $[M - H - 1]^-$  peak for a  $^{10}B$  ion.



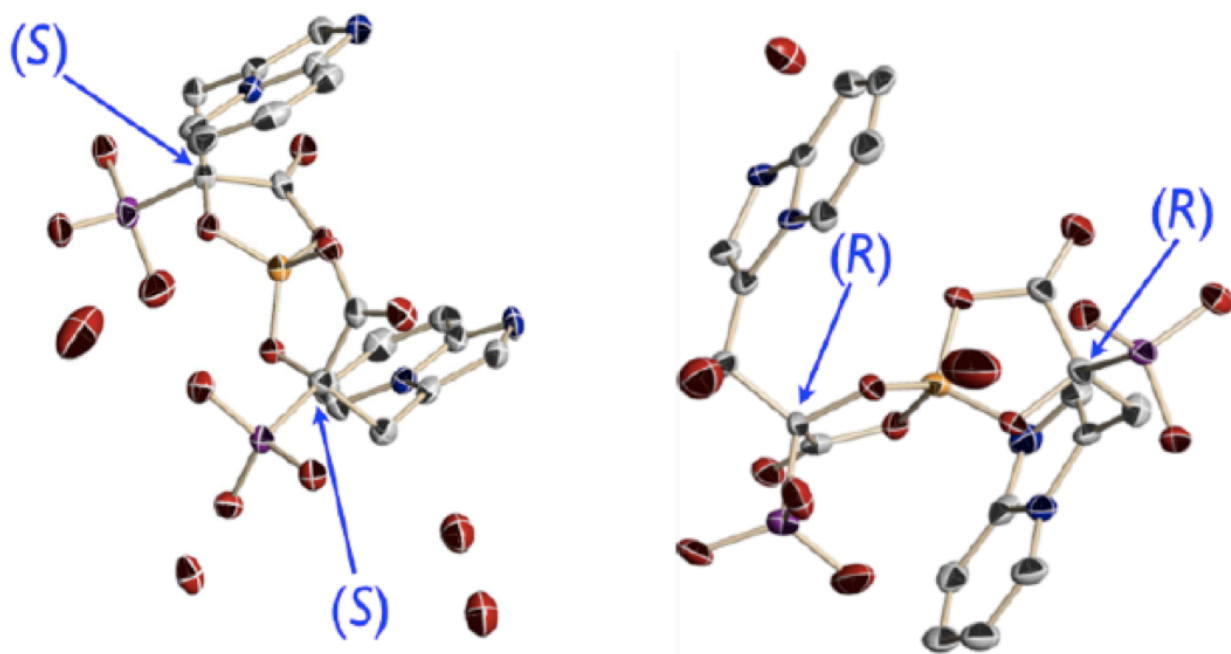

**Figure S8.** ORTEP drawings of both (*S,S*)-**3** and (*R,R*)-**3** dimer boron complexes formed in the crystal. Thermal ellipsoids are shown at the 50% probability level.

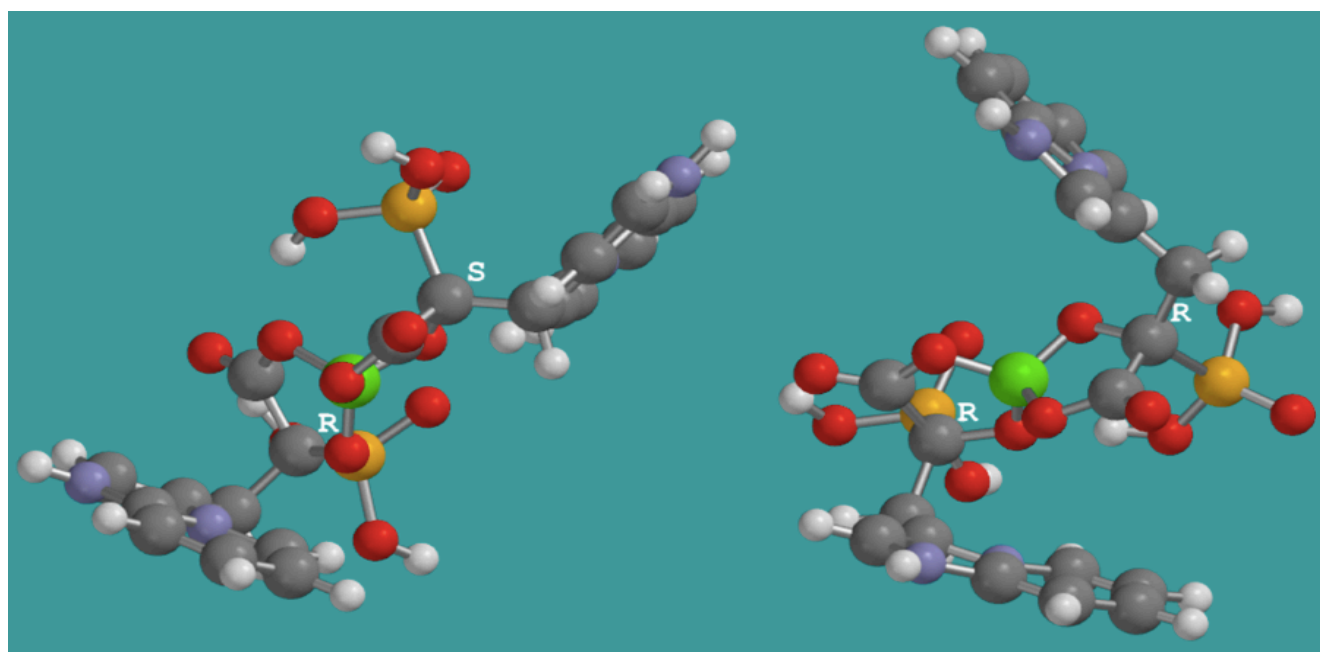

**Figure S9.** Structures of diastereomeric dimer boron complexes. The structure calculated by geometric direct minimization using the Spartan '08 Quantum Mechanics software suite. Left: heterochiral, (*R,S*) dimer complex. Right: homochiral, (*R,R*) dimer complex (*cf.* Figure S8, S10). Thermal ellipsoids are shown at the 50% probability level.

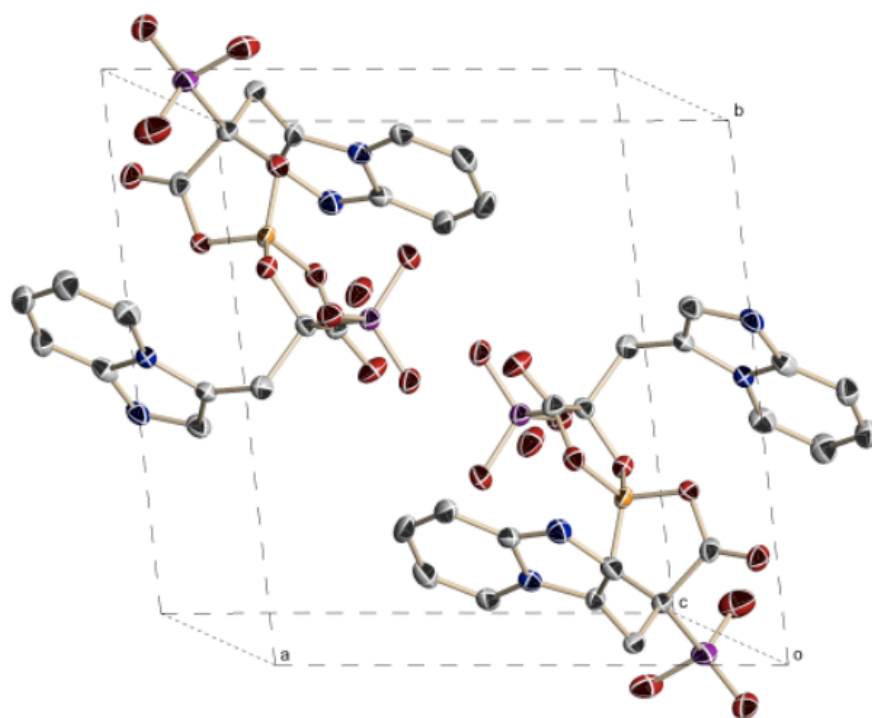

**Figure S10.** Unit cell of the (*R,R*)-**3** and (*S,S*)-**3** dimer boron complex. Thermal ellipsoids are shown at the 50% probability level.

**Table S1.** Crystal data and structure refinement for C<sub>20</sub>H<sub>14</sub>BN<sub>4</sub>O<sub>16</sub>P<sub>2</sub>.

|                                   |                                                                                |                |
|-----------------------------------|--------------------------------------------------------------------------------|----------------|
| Identification code               | kv89_0m                                                                        |                |
| Empirical formula                 | C <sub>20</sub> H <sub>20</sub> BN <sub>4</sub> O <sub>13</sub> P <sub>2</sub> |                |
| Formula weight                    | 597.15                                                                         |                |
| Temperature                       | 143(2) K                                                                       |                |
| Wavelength                        | 0.71073 Å                                                                      |                |
| Crystal system                    | Triclinic                                                                      |                |
| Space group                       | P-1                                                                            |                |
| Unit cell dimensions              | a = 10.3622(7) Å                                                               | α = 73.036(3)° |
|                                   | b = 11.2452(8) Å                                                               | β = 79.538(3)° |
|                                   | c = 11.8058(9) Å                                                               | γ = 84.082(3)° |
| Volume                            | 1292.10(16) Å <sup>3</sup>                                                     |                |
| Z                                 | 2                                                                              |                |
| Density (calculated)              | 1.535 Mg/m <sup>3</sup>                                                        |                |
| Absorption coefficient            | 0.243 mm <sup>-1</sup>                                                         |                |
| F(000)                            | 614                                                                            |                |
| Crystal size                      | 0.15 x 0.12 x 0.10 mm <sup>3</sup>                                             |                |
| Theta range for data collection   | 1.83 to 27.48°                                                                 |                |
| Index ranges                      | -12 ≤ h ≤ 13, -13 ≤ k ≤ 14, 0 ≤ l ≤ 15                                         |                |
| Reflections collected             | 5588                                                                           |                |
| Independent reflections           | 5588 [R(int) = 0.0398]                                                         |                |
| Completeness to theta = 27.48°    | 94.1%                                                                          |                |
| Absorption correction             | Multi-scan                                                                     |                |
| Transmission factors              | min/max: 0.794                                                                 |                |
| Refinement method                 | Full-matrix least-squares on F <sup>2</sup>                                    |                |
| Data / restraints / parameters    | 5588 / 0 / 377                                                                 |                |
| Goodness-of-fit on F <sup>2</sup> | 1.013                                                                          |                |
| Final R indices [I > 2σ(I)]       | R1 = 0.0777, wR2 = 0.2124                                                      |                |
| R indices (all data)              | R1 = 0.1142, wR2 = 0.2362                                                      |                |
| Largest diff. peak and hole       | 0.681 and -0.913 e.Å <sup>-3</sup>                                             |                |

**Table S2.** Atomic coordinates ( $\times 10^4$ ) and equivalent isotropic displacement parameters ( $\text{\AA}^2 \times 10^3$ ) for  $\text{C}_{20}\text{H}_{14}\text{BN}_4\text{O}_{16}\text{P}_2$ .

U(eq) is defined as one third of the trace of the orthogonalized Uij tensor.

|       | x        | y        | z       | U(eq)  |
|-------|----------|----------|---------|--------|
| B(1)  | 8703(4)  | 7631(4)  | 2658(4) | 20(1)  |
| C(1)  | 10091(4) | 8509(4)  | 3518(4) | 24(1)  |
| C(2)  | 9180(4)  | 9536(4)  | 2880(4) | 20(1)  |
| C(3)  | 8360(4)  | 10190(4) | 3797(4) | 24(1)  |
| C(4)  | 7500(4)  | 9295(4)  | 4733(4) | 23(1)  |
| C(5)  | 7652(4)  | 8627(4)  | 5876(4) | 24(1)  |
| C(6)  | 5767(4)  | 8084(4)  | 5574(4) | 24(1)  |
| C(7)  | 4577(4)  | 7594(4)  | 5624(5) | 30(1)  |
| C(8)  | 3945(4)  | 8008(4)  | 4666(5) | 36(1)  |
| C(9)  | 4468(4)  | 8948(4)  | 3635(5) | 33(1)  |
| C(10) | 5644(4)  | 9406(4)  | 3606(4) | 27(1)  |
| C(11) | 7440(4)  | 5909(4)  | 3053(4) | 25(1)  |
| C(12) | 8296(4)  | 6064(4)  | 1826(4) | 21(1)  |
| C(13) | 9275(4)  | 4929(4)  | 1847(4) | 26(1)  |
| C(14) | 10193(4) | 4763(4)  | 2716(4) | 23(1)  |
| C(15) | 10167(4) | 4029(4)  | 3851(4) | 27(1)  |
| C(16) | 11955(4) | 5096(4)  | 3464(4) | 26(1)  |
| C(17) | 13112(4) | 5604(4)  | 3487(4) | 29(1)  |
| C(18) | 13605(4) | 6482(4)  | 2475(5) | 35(1)  |
| C(19) | 12959(4) | 6841(4)  | 1469(4) | 35(1)  |
| C(20) | 11830(4) | 6322(4)  | 1464(4) | 29(1)  |
| N(1)  | 6298(3)  | 8970(3)  | 4566(3) | 22(1)  |
| N(2)  | 6588(3)  | 7891(3)  | 6363(3) | 27(1)  |
| N(3)  | 11337(3) | 5423(3)  | 2476(3) | 23(1)  |
| N(4)  | 11229(3) | 4220(3)  | 4303(3) | 27(1)  |
| O(1)  | 8357(3)  | 8944(3)  | 2402(3) | 24(1)  |
| O(2)  | 9847(3)  | 7437(2)  | 3330(3) | 21(1)  |
| O(3)  | 10890(3) | 8605(3)  | 4094(3) | 29(1)  |
| O(4)  | 11050(4) | 9746(4)  | 940(4)  | 48(1)  |
| O(5)  | 10773(3) | 11525(3) | 1982(3) | 32(1)  |
| O(6)  | 9149(3)  | 11278(3) | 753(3)  | 35(1)  |
| O(7)  | 8975(3)  | 7159(2)  | 1611(2) | 21(1)  |
| O(8)  | 7645(3)  | 6835(3)  | 3480(3) | 23(1)  |
| O(9)  | 6718(3)  | 5082(3)  | 3573(3) | 32(1)  |
| O(10) | 8306(3)  | 6486(3)  | -553(3) | 29(1)  |
| O(11) | 6608(3)  | 5144(3)  | 804(3)  | 27(1)  |
| O(12) | 6386(3)  | 7445(3)  | 650(3)  | 28(1)  |
| O(13) | 5785(4)  | 6047(3)  | 8437(3) | 38(1)  |
| P(1)  | 10167(1) | 10600(1) | 1584(1) | 28(1)  |
| P(2)  | 7290(1)  | 6297(1)  | 632(1)  | 22(1)  |
| O(23) | 6675(5)  | 9687(4)  | 5072(7) | 103(2) |
| P(1)  | 10164(1) | 10598(1) | 6582(1) | 27(1)  |
| P(2)  | 7290(1)  | 6299(1)  | 5631(1) | 21(1)  |

**Table S3.** Bond lengths [Å] and angles [°] for C<sub>20</sub>H<sub>14</sub>BN<sub>4</sub>O<sub>16</sub>P<sub>2</sub>.

|             |          |                   |          |                   |            |
|-------------|----------|-------------------|----------|-------------------|------------|
| B(1)-O(1)   | 1.438(5) | O(5)-P(1)         | 1.492(4) | C(11)-C(12)-P(2)  | 111.5(3)   |
| B(1)-O(7)   | 1.454(6) | O(6)-P(1)         | 1.559(3) | C(13)-C(12)-P(2)  | 110.6(3)   |
| B(1)-O(8)   | 1.502(5) | O(10)-P(2)        | 1.565(3) | C(14)-C(13)-C(12) | 113.0(4)   |
| B(1)-O(2)   | 1.507(5) | O(11)-P(2)        | 1.485(3) | C(15)-C(14)-N(3)  | 104.7(4)   |
| C(1)-O(3)   | 1.195(5) | O(12)-P(2)        | 1.518(3) | C(15)-C(14)-C(13) | 131.6(4)   |
| C(1)-O(2)   | 1.343(5) | O(1)-B(1)-O(7)    | 114.6(3) | N(3)-C(14)-C(13)  | 123.8(4)   |
| C(1)-C(2)   | 1.522(5) | O(1)-B(1)-O(8)    | 113.5(3) | C(14)-C(15)-N(4)  | 110.1(4)   |
| C(2)-O(1)   | 1.414(5) | O(7)-B(1)-O(8)    | 104.1(3) | N(4)-C(16)-N(3)   | 106.1(4)   |
| C(2)-C(3)   | 1.561(6) | O(1)-B(1)-O(2)    | 104.8(3) | N(4)-C(16)-C(17)  | 131.1(4)   |
| C(2)-P(1)   | 1.854(4) | O(7)-B(1)-O(2)    | 113.5(3) | N(3)-C(16)-C(17)  | 122.8(4)   |
| C(3)-C(4)   | 1.486(6) | O(8)-B(1)-O(2)    | 106.3(3) | C(18)-C(17)-C(16) | 116.6(4)   |
| C(4)-C(5)   | 1.368(6) | O(3)-C(1)-O(2)    | 124.4(4) | C(17)-C(18)-C(19) | 120.8(4)   |
| C(4)-N(1)   | 1.396(5) | O(3)-C(1)-C(2)    | 127.5(4) | C(20)-C(19)-C(18) | 121.6(4)   |
| C(5)-N(2)   | 1.382(5) | O(2)-C(1)-C(2)    | 108.1(3) | C(19)-C(20)-N(3)  | 117.9(4)   |
| C(6)-N(2)   | 1.331(5) | O(1)-C(2)-C(1)    | 106.0(3) | C(10)-N(1)-C(6)   | 120.5(4)   |
| C(6)-N(1)   | 1.377(5) | O(1)-C(2)-C(3)    | 111.1(3) | C(10)-N(1)-C(4)   | 129.9(4)   |
| C(6)-C(7)   | 1.387(6) | C(1)-C(2)-C(3)    | 109.6(3) | C(6)-N(1)-C(4)    | 109.6(3)   |
| C(7)-C(8)   | 1.350(7) | O(1)-C(2)-P(1)    | 106.6(3) | C(6)-N(2)-C(5)    | 110.0(3)   |
| C(8)-C(9)   | 1.421(7) | C(1)-C(2)-P(1)    | 109.0(3) | C(16)-N(3)-C(20)  | 120.3(4)   |
| C(9)-C(10)  | 1.362(6) | C(3)-C(2)-P(1)    | 114.2(3) | C(16)-N(3)-C(14)  | 110.1(3)   |
| C(10)-N(1)  | 1.368(5) | C(4)-C(3)-C(2)    | 110.4(3) | C(20)-N(3)-C(14)  | 129.6(4)   |
| C(11)-O(9)  | 1.202(5) | C(5)-C(4)-N(1)    | 105.5(4) | C(16)-N(4)-C(15)  | 109.1(4)   |
| C(11)-O(8)  | 1.332(5) | C(5)-C(4)-C(3)    | 131.1(4) | C(2)-O(1)-B(1)    | 110.5(3)   |
| C(11)-C(12) | 1.527(6) | N(1)-C(4)-C(3)    | 123.5(4) | C(1)-O(2)-B(1)    | 110.4(3)   |
| C(12)-O(7)  | 1.417(5) | C(4)-C(5)-N(2)    | 108.2(4) | C(12)-O(7)-B(1)   | 110.4(3)   |
| C(12)-C(13) | 1.544(6) | N(2)-C(6)-N(1)    | 106.7(4) | C(11)-O(8)-B(1)   | 110.8(3)   |
| C(12)-P(2)  | 1.844(4) | N(2)-C(6)-C(7)    | 132.6(4) | O(5)-P(1)-O(4)    | 119.4(2)   |
| C(13)-C(14) | 1.483(6) | N(1)-C(6)-C(7)    | 120.7(4) | O(5)-P(1)-O(6)    | 109.81(17) |
| C(14)-C(15) | 1.350(6) | C(8)-C(7)-C(6)    | 118.7(4) | O(4)-P(1)-O(6)    | 106.8(2)   |
| C(14)-N(3)  | 1.405(5) | C(7)-C(8)-C(9)    | 121.0(4) | O(5)-P(1)-C(2)    | 110.48(19) |
| C(15)-N(4)  | 1.368(6) | C(10)-C(9)-C(8)   | 119.1(4) | O(4)-P(1)-C(2)    | 105.0(2)   |
| C(16)-N(4)  | 1.353(5) | C(9)-C(10)-N(1)   | 120.0(4) | O(6)-P(1)-C(2)    | 104.28(18) |
| C(16)-N(3)  | 1.370(5) | O(9)-C(11)-O(8)   | 124.7(4) | O(11)-P(2)-O(12)  | 114.79(17) |
| C(16)-C(17) | 1.388(6) | O(9)-C(11)-C(12)  | 126.6(4) | O(11)-P(2)-O(10)  | 107.5(2)   |
| C(17)-C(18) | 1.363(7) | O(8)-C(11)-C(12)  | 108.7(3) | O(12)-P(2)-O(10)  | 112.40(19) |
| C(18)-C(19) | 1.405(7) | O(7)-C(12)-C(11)  | 105.4(3) | O(11)-P(2)-C(12)  | 109.71(18) |
| C(19)-C(20) | 1.362(7) | O(7)-C(12)-C(13)  | 110.5(3) | O(12)-P(2)-C(12)  | 107.17(18) |
| C(20)-N(3)  | 1.375(5) | C(11)-C(12)-C(13) | 110.3(3) | O(10)-P(2)-C(12)  | 104.81(18) |
| O(4)-P(1)   | 1.526(4) | O(7)-C(12)-P(2)   | 108.4(3) |                   |            |

**Table S4.** Anisotropic displacement parameters ( $\text{\AA}^2 \times 10^3$ ) for  $\text{C}_{20}\text{H}_{14}\text{BN}_4\text{O}_{16}\text{P}_2$ .

The anisotropic displacement factor exponent takes the form:  $-2\pi^2[h^2 a^{*2}U^{11} + \dots + 2 h k a^* b^* U^{12}]$

|       | U <sup>11</sup> | U <sup>22</sup> | U <sup>33</sup> | U <sup>23</sup> | U <sup>13</sup> | U <sup>12</sup> |
|-------|-----------------|-----------------|-----------------|-----------------|-----------------|-----------------|
| B(1)  | 15(2)           | 19(3)           | 21(3)           | -2(2)           | -3(2)           | -4(2)           |
| C(1)  | 23(2)           | 21(2)           | 29(3)           | -6(2)           | -2(2)           | -1(2)           |
| C(2)  | 22(2)           | 28(3)           | 38(3)           | -14(2)          | 1(2)            | -4(2)           |
| C(3)  | 18(2)           | 36(3)           | 46(3)           | -23(3)          | 1(2)            | -4(2)           |
| C(4)  | 29(3)           | 32(3)           | 42(3)           | -17(2)          | -15(2)          | 10(2)           |
| C(5)  | 27(2)           | 22(2)           | 36(3)           | -14(2)          | -9(2)           | 0(2)            |
| C(6)  | 17(2)           | 20(2)           | 27(3)           | -8(2)           | -4(2)           | -1(2)           |
| C(7)  | 18(2)           | 26(2)           | 22(2)           | -5(2)           | -3(2)           | 2(2)            |
| C(8)  | 21(2)           | 20(2)           | 28(3)           | -4(2)           | -6(2)           | -4(2)           |
| C(9)  | 20(2)           | 18(2)           | 21(2)           | -2(2)           | -3(2)           | -4(2)           |
| C(10) | 21(2)           | 23(2)           | 19(2)           | 0(2)            | -4(2)           | -3(2)           |
| C(11) | 28(2)           | 22(2)           | 24(3)           | -6(2)           | -5(2)           | 5(2)            |
| C(12) | 26(2)           | 36(3)           | 29(3)           | -15(2)          | -6(2)           | 2(2)            |
| C(13) | 22(2)           | 33(3)           | 43(3)           | -12(2)          | -2(2)           | -5(2)           |
| C(14) | 28(3)           | 32(3)           | 32(3)           | 0(2)            | 2(2)            | -3(2)           |
| C(15) | 27(2)           | 32(3)           | 19(2)           | 0(2)            | -3(2)           | -1(2)           |
| C(16) | 18(2)           | 19(2)           | 29(3)           | -6(2)           | -5(2)           | 3(2)            |
| C(17) | 26(2)           | 24(2)           | 27(3)           | -4(2)           | -5(2)           | 1(2)            |
| C(18) | 25(2)           | 25(3)           | 28(3)           | -9(2)           | -6(2)           | -2(2)           |
| C(19) | 18(2)           | 20(2)           | 23(2)           | -6(2)           | -5(2)           | -1(2)           |
| C(20) | 24(2)           | 21(2)           | 26(3)           | -1(2)           | -8(2)           | -2(2)           |
| N(1)  | 21(2)           | 19(2)           | 24(2)           | -5(2)           | -3(2)           | -1(2)           |
| N(2)  | 23(2)           | 25(2)           | 30(2)           | -8(2)           | -4(2)           | -1(2)           |
| N(3)  | 20(2)           | 19(2)           | 25(2)           | -5(2)           | -5(2)           | 2(2)            |
| N(4)  | 24(2)           | 24(2)           | 27(2)           | 1(2)            | -3(2)           | 3(2)            |
| O(1)  | 30(2)           | 27(2)           | 27(2)           | 3(2)            | -6(2)           | -10(2)          |
| O(2)  | 54(2)           | 23(2)           | 29(2)           | 1(2)            | -19(2)          | -6(2)           |
| O(3)  | 52(2)           | 25(2)           | 56(3)           | -8(2)           | 20(2)           | -8(2)           |
| O(4)  | 25(2)           | 27(2)           | 31(2)           | -5(2)           | -12(2)          | -4(1)           |
| O(5)  | 20(2)           | 19(2)           | 26(2)           | -3(1)           | -9(1)           | -1(1)           |
| O(6)  | 22(2)           | 17(2)           | 24(2)           | -4(1)           | -9(1)           | 0(1)            |
| O(7)  | 19(2)           | 19(2)           | 22(2)           | -5(1)           | -3(1)           | -3(1)           |
| O(8)  | 20(2)           | 24(2)           | 19(2)           | -3(1)           | 0(1)            | -2(1)           |
| O(9)  | 38(2)           | 30(2)           | 29(2)           | -3(2)           | -2(2)           | -19(2)          |
| O(10) | 21(2)           | 26(2)           | 33(2)           | -5(2)           | -8(1)           | 4(1)            |
| O(11) | 28(2)           | 28(2)           | 23(2)           | -7(1)           | -1(1)           | -4(1)           |
| O(12) | 25(2)           | 25(2)           | 29(2)           | -4(1)           | -9(1)           | -5(1)           |
| O(20) | 45(2)           | 45(2)           | 39(2)           | -2(2)           | -7(2)           | 3(2)            |
| O(21) | 36(2)           | 31(2)           | 30(2)           | 4(2)            | -11(2)          | -12(2)          |
| O(22) | 57(3)           | 47(3)           | 47(3)           | 0(2)            | -12(2)          | 2(2)            |
| O(23) | 70(3)           | 34(3)           | 179(7)          | -35(3)          | 67(4)           | -14(3)          |
| P(1)  | 28(1)           | 20(1)           | 26(1)           | 1(1)            | 0(1)            | -4(1)           |
| P(2)  | 20(1)           | 19(1)           | 23(1)           | -4(1)           | -5(1)           | -2(1)           |

**Table S5.** Hydrogen coordinates ( $\times 10^4$ ) and isotropic displacement parameters ( $\text{\AA}^2 \times 10^3$ ) for  $\text{C}_{20}\text{H}_{14}\text{BN}_4\text{O}_{16}\text{P}_2$ .

|        | x         | y        | z         | U(eq)   |
|--------|-----------|----------|-----------|---------|
| H(3A)  | 8960      | 10524    | 4179      | 28      |
| H(3B)  | 7814      | 10896    | 3372      | 28      |
| H(5)   | 8365      | 8662     | 6267      | 28      |
| H(7)   | 4213      | 6980     | 6318      | 36      |
| H(8)   | 3139      | 7665     | 4681      | 43      |
| H(9)   | 4003      | 9254     | 2975      | 40      |
| H(10)  | 6010      | 10027    | 2919      | 33      |
| H(13A) | 8777      | 4168     | 2055      | 31      |
| H(13B) | 9790      | 5029     | 1035      | 31      |
| H(15)  | 9507      | 3462     | 4273      | 32      |
| H(17)  | 13539     | 5351     | 4173      | 35      |
| H(18)  | 14395     | 6857     | 2449      | 41      |
| H(19)  | 13318     | 7460     | 777       | 42      |
| H(20)  | 11395     | 6574     | 783       | 35      |
| H(21)  | 11350(40) | 9740(40) | 1410(40)  | 0(12)   |
| H(22)  | 8370(60)  | 7070(60) | -700(60)  | 50(20)  |
| H(23)  | 5120(50)  | 5670(50) | 8460(50)  | 31(14)  |
| H(24)  | 6010(100) | 5580(90) | 9390(100) | 160(40) |
| H(2)   | 6471      | 7372     | 7089      | 32      |
| H(4)   | 11411     | 3834     | 5024      | 33      |

### Parameters and numerical results for Spartan calculations of dimer complexes of boron.

Output for RR

Number of shells: 161

Number of basis functions: 411

Multiplicity: 1

SCF model:

A restricted Hartree-Fock SCF calculation will be performed using Pulay DIIS + Geometric Direct Minimization

Optimization:

Step Energy Max Grad. Max Dist.

|    |              |          |          |
|----|--------------|----------|----------|
| 1  | -2577.679174 | 0.081476 | 0.085455 |
| 2  | -2577.731871 | 0.048966 | 0.074890 |
| 3  | -2577.760928 | 0.030531 | 0.076737 |
| 4  | -2577.770978 | 0.019101 | 0.062813 |
| 5  | -2577.773615 | 0.009770 | 0.074885 |
| 6  | -2577.774774 | 0.008286 | 0.056011 |
| 7  | -2577.775583 | 0.010284 | 0.085350 |
| 8  | -2577.776547 | 0.007853 | 0.108199 |
| 9  | -2577.777370 | 0.012197 | 0.096527 |
| 10 | -2577.778338 | 0.009290 | 0.134898 |
| 11 | -2577.779188 | 0.009124 | 0.101273 |
| 12 | -2577.779692 | 0.007069 | 0.104763 |
| 13 | -2577.779515 | 0.012483 | 0.046241 |
| 14 | -2577.780520 | 0.006508 | 0.066723 |
| 15 | -2577.780779 | 0.004873 | 0.077441 |
| 16 | -2577.781055 | 0.004102 | 0.063665 |
| 17 | -2577.781335 | 0.004030 | 0.032589 |
| 18 | -2577.781525 | 0.003658 | 0.057214 |
| 19 | -2577.781733 | 0.003674 | 0.065537 |
| 20 | -2577.781958 | 0.004189 | 0.071551 |
| 21 | -2577.782250 | 0.003232 | 0.073724 |
| 22 | -2577.782550 | 0.002992 | 0.070068 |
| 23 | -2577.782841 | 0.004060 | 0.037014 |
| 24 | -2577.783044 | 0.003526 | 0.042215 |
| 25 | -2577.783179 | 0.003278 | 0.030072 |
| 26 | -2577.783218 | 0.003131 | 0.028644 |
| 27 | -2577.783248 | 0.002784 | 0.023885 |
| 28 | -2577.783273 | 0.002255 | 0.024593 |
| 29 | -2577.783285 | 0.002204 | 0.026632 |
| 30 | -2577.783307 | 0.002759 | 0.026893 |
| 31 | -2577.783328 | 0.002187 | 0.011101 |
| 32 | -2577.783347 | 0.002359 | 0.014608 |
| 33 | -2577.783366 | 0.002115 | 0.017854 |
| 34 | -2577.783383 | 0.002324 | 0.023229 |
| 35 | -2577.783413 | 0.002582 | 0.026607 |
| 36 | -2577.783440 | 0.002380 | 0.020890 |
| 37 | -2577.783459 | 0.002427 | 0.015486 |
| 38 | -2577.783478 | 0.002020 | 0.009304 |
| 39 | -2577.783495 | 0.001946 | 0.008863 |
| 40 | -2577.783513 | 0.001661 | 0.010723 |
| 41 | -2577.783529 | 0.001378 | 0.006323 |
| 42 | -2577.783538 | 0.000998 | 0.003901 |
| 43 | -2577.783543 | 0.000591 | 0.002967 |
| 44 | -2577.783547 | 0.000367 | 0.002559 |
| 45 | -2577.783550 | 0.000172 | 0.003852 |
| 46 | -2577.783551 | 0.000121 | 0.001153 |

Reason for exit: Successful completion



Quantum Calculation CPU Time : 1:37:39.98  
Quantum Calculation Wall Time: 1:40:27.83  
SPARTAN '08 Properties Program: (PC/×86) Release 132  
Reason for exit: Successful completion  
Properties CPU Time : 4.05  
Properties Wall Time: 4.19

Output for RS

Number of shells: 161  
Number of basis functions: 411  
Multiplicity: 1  
SCF model:

A restricted Hartree-Fock SCF calculation will be  
performed using Pulay DIIS + Geometric Direct Minimization  
Optimization:

| Step | Energy       | Max Grad. | Max Dist. |
|------|--------------|-----------|-----------|
| 1    | -2577.676182 | 0.066036  | 0.090712  |
| 2    | -2577.729882 | 0.045007  | 0.073872  |
| 3    | -2577.759333 | 0.025576  | 0.088634  |
| 4    | -2577.769484 | 0.012252  | 0.091373  |
| 5    | -2577.773479 | 0.006663  | 0.084285  |
| 6    | -2577.776184 | 0.007370  | 0.083197  |
| 7    | -2577.778151 | 0.009319  | 0.073293  |
| 8    | -2577.779663 | 0.014708  | 0.071188  |
| 9    | -2577.780716 | 0.011412  | 0.081350  |
| 10   | -2577.781457 | 0.016341  | 0.094951  |
| 11   | -2577.782079 | 0.010137  | 0.041264  |
| 12   | -2577.782775 | 0.010029  | 0.041196  |
| 13   | -2577.783385 | 0.010230  | 0.053626  |
| 14   | -2577.783632 | 0.006671  | 0.032460  |
| 15   | -2577.783860 | 0.009689  | 0.034482  |
| 16   | -2577.784041 | 0.008405  | 0.050175  |
| 17   | -2577.784204 | 0.008235  | 0.052582  |
| 18   | -2577.784403 | 0.007018  | 0.095961  |
| 19   | -2577.784637 | 0.005946  | 0.100752  |
| 20   | -2577.784867 | 0.005338  | 0.106192  |
| 21   | -2577.785146 | 0.005536  | 0.127900  |
| 22   | -2577.785464 | 0.004265  | 0.101086  |
| 23   | -2577.785843 | 0.007310  | 0.103763  |
| 24   | -2577.786269 | 0.008199  | 0.108093  |
| 25   | -2577.786741 | 0.011026  | 0.102298  |
| 26   | -2577.787078 | 0.012211  | 0.096353  |
| 27   | -2577.787363 | 0.012625  | 0.087728  |
| 28   | -2577.787583 | 0.011683  | 0.065790  |
| 29   | -2577.787787 | 0.008680  | 0.060423  |
| 30   | -2577.788089 | 0.008186  | 0.072112  |
| 31   | -2577.788340 | 0.007020  | 0.022992  |
| 32   | -2577.788564 | 0.006163  | 0.057685  |
| 33   | -2577.788921 | 0.003815  | 0.049761  |
| 34   | -2577.789112 | 0.004144  | 0.058509  |
| 35   | -2577.789345 | 0.005438  | 0.051949  |
| 36   | -2577.789543 | 0.003767  | 0.048768  |
| 37   | -2577.789683 | 0.002666  | 0.014632  |
| 38   | -2577.789773 | 0.002638  | 0.012514  |
| 39   | -2577.789827 | 0.002977  | 0.014069  |
| 40   | -2577.789859 | 0.002664  | 0.008578  |
| 41   | -2577.789885 | 0.002426  | 0.008944  |

42 -2577.789912 0.001811 0.012225  
43 -2577.789937 0.001444 0.011812  
44 -2577.789962 0.001193 0.014188  
45 -2577.789981 0.000872 0.012184  
46 -2577.789994 0.000729 0.015445  
47 -2577.790004 0.000404 0.011521  
48 -2577.790010 0.000319 0.007656  
49 -2577.790012 0.000200 0.003859  
50 -2577.790013 0.000163 0.001841  
Reason for exit: Successful completion  
Quantum Calculation CPU Time : 1:43:12.91  
Quantum Calculation Wall Time: 1:45:10.06  
SPARTAN '08 Properties Program: (PC/x86) Release 132  
Reason for exit: Successful completion  
Properties CPU Time : 4.05  
Properties Wall Time: 4.08

### Reference List

1. C. E. McKenna, B. A. Kashemirov, K. M. Błażewska, I. Mallard-Favier, C. A. Stewart, J. Rojas, M. W. Lundy, F. H. Ebetino, R. A. Baron, M. L. Kirsten, J. E. Dunford, M. C. Seabra, J. L. Bala, M. S. Marma, M. J. Rogers and F. P. Coxon, *J. Med. Chem.*, 2010, **53**, 3454-3464.
2. SMART V 5.63, Software for the CCD Detector System, Bruker AXS Madison, WI, 2002.
3. SAINT PLUS V 6.54 A, Software for the CCD Detector System. Bruker AXS Madison, WI, 2003.
4. SADABS, Software for the CCD Detector System, Bruker AXS Madison, WI, 2003.
5. G. M. Sheldrick, SHELXS-90, Program for the Solution of Crystal Structure, University of Göttingen, Germany, 1990, SHELXL-97, Program for the Refinement of Crystal Structure, University of Göttingen, Germany, 1997; SHELXTL 6.14 for Windows NT/2000, Program library for Structure Solution and Molecular Graphics, Bruker AXS, Madison, WI, 2003.
6. L. J. Farrugia, *J. Appl. Cryst.*, 1997, **30**, 565.
